# Supplementary material for: Rapid organic solvent extraction coupled with surface enhanced Raman spectroscopic mapping for ultrasensitive quantification of foliarly applied silver nanoparticles in plant leaves
Source: Royal Society of Chemistry journal article supplement (doi:10.1039/c9en01246j), 2020-01-01
Supplement: c9en01246j1.pdf [file c9en01246j1.pdf]

# SUPPORTING INFORMATION

## Rapid organic solvent extraction coupled with surface enhanced Raman spectroscopic mapping for ultrasensitive quantification of foliarly applied silver nanoparticles in plant leaves

Zhiyun Zhang<sup>1</sup>, Ming Xia<sup>1,2</sup>, Chuanxin Ma<sup>3</sup>, Huiyuan Guo<sup>4</sup>, Wenhao Wu<sup>4</sup>,  
Jason C. White<sup>3</sup>, Baoshan Xing<sup>4</sup>, and Lili He<sup>1</sup>

<sup>1</sup>Department of Food Science, University of Massachusetts, Amherst,  
Massachusetts 01003, United States

<sup>2</sup>College of Pharmacy, Zhejiang Chinese Medical University, Zhejiang  
Province 310053, P. R. China

<sup>3</sup>Department of Analytical Chemistry, The Connecticut Agricultural  
Experiment Station, New Haven, Connecticut 06511, United States

<sup>4</sup>Stockbridge School of Agriculture, University of Massachusetts, Amherst,  
Massachusetts 01003, United States

\* **Corresponding Author:** Lili He,

**Mailing Address:** 240 Chenoweth Laboratory, 102 Holdsworth Way, Amherst, MA  
01003,

**E-mail:** [lilihe@foodsci.umass.edu](mailto:lilihe@foodsci.umass.edu),

**Telephone:** +1 (413) 545-5847

36 **Inductively Coupled Plasma-Mass Spectrometry (ICP-MS).** To determine the  
37 extraction efficiency of AgNPs from spinach leaves by organic solvent, AgNPs  
38 contaminated spinach leaves with organic solvent treatment were stored at ambient  
39 temperature prior to digestion. For the digestion process, spinach leaves were immersed  
40 with 3 mL HNO<sub>3</sub> (ACS reagent, 70%) in a 15 mL centrifuge tube overnight. Spinach leaves  
41 were microwaved to reach a temperature of 115 °C for 40 min, and then samples were  
42 cooled to room temperature. Five hundred μL of H<sub>2</sub>O<sub>2</sub> was added to further digest the  
43 sample at 115 °C for 30 min. DI water was used to dilute the resultant digests to a total  
44 volume of 40 mL and then the diluent was filtered through polyethersulfone (PES)  
45 membrane prior to ICP-MS (Agilent 7500ce, Santa Clara, CA) analysis.

46 
$$\eta_p = \left( \frac{[AgNPs]_{nominal} - [AgNPs]_{leaf}}{[AgNPs]_{nominal}} \right) \times 100$$

47 Where  $\eta_p$  refer to the extraction efficiency of AgNPs from plants.

48
